# Supplementary material
Source: Springer Nature journal article supplement (https://www.springermedizin.de/resource/supplementary/13223_2012_372_MOESM2_ESM.pdf/9597822)
Supplement: MOESM2 [file 9597822]

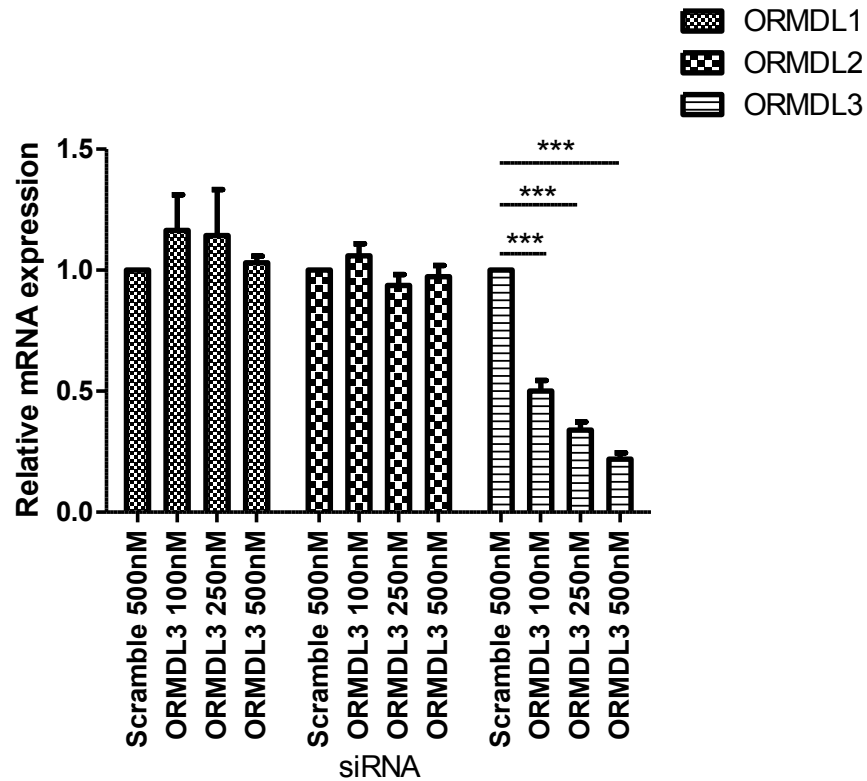

Specificity of *ORMDL3* siRNA. Relative expression levels of *ORMDL1*, *ORMDL2*, and *ORMDL3* were quantified 72 hours after transfection with *ORMDL3* siRNA in A549 cells. Gene expression is compared relative to cells transfected with scramble siRNA, a non-specific siRNA (negative control). Data represent the mean  $\pm$  SEM of three experimental repeats. Statistical analysis was performed using one-way ANOVA with Bonferroni post-test. \*\*\* signifies  $p < 0.001$ .

A

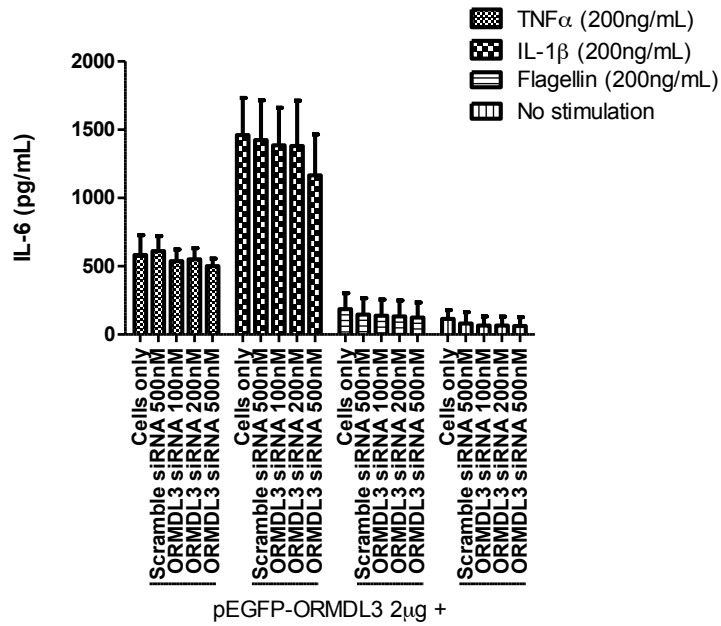

B

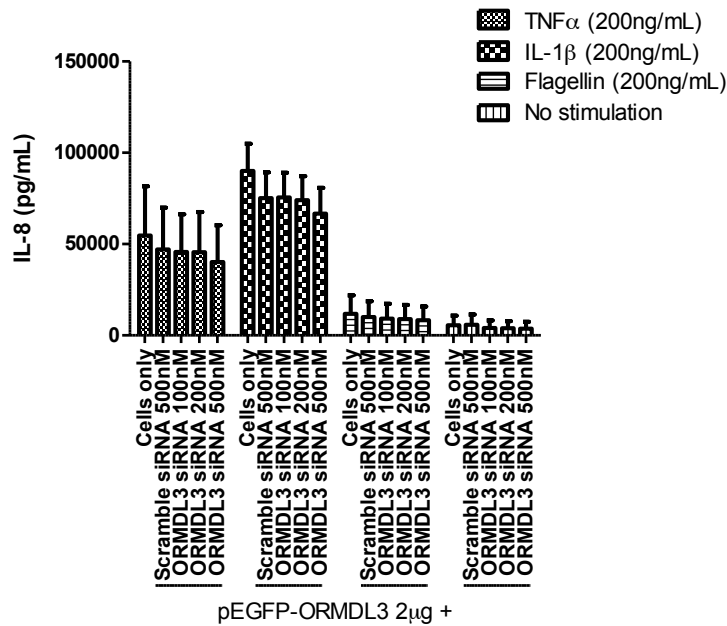

Cytokine production in plasmid and siRNA co-transfected A549 cells. A) Secreted IL-6 levels and B) secreted IL-8 levels after cell stimulation. Cells were stimulated with TNFα, flagellin, or IL-1β for 24 hours. Data represent the mean ± SEM of three experimental repeats. Statistical analysis was performed using one-way ANOVA with Bonferroni post-test.

A

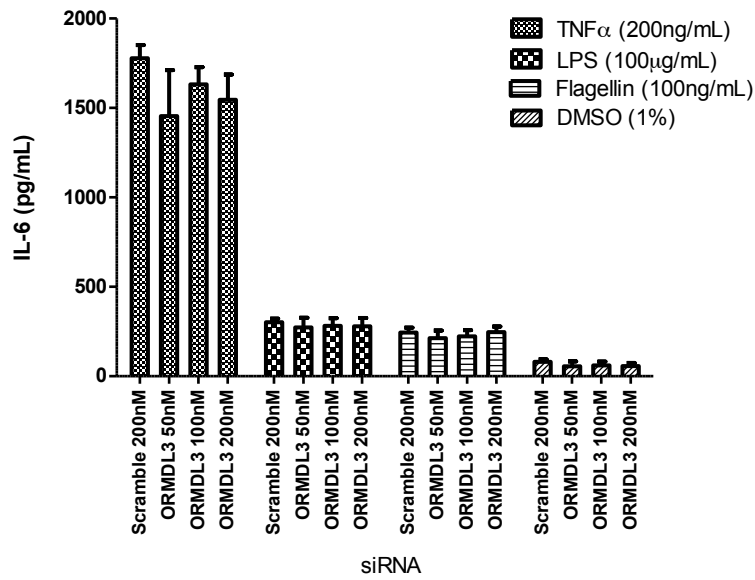

B

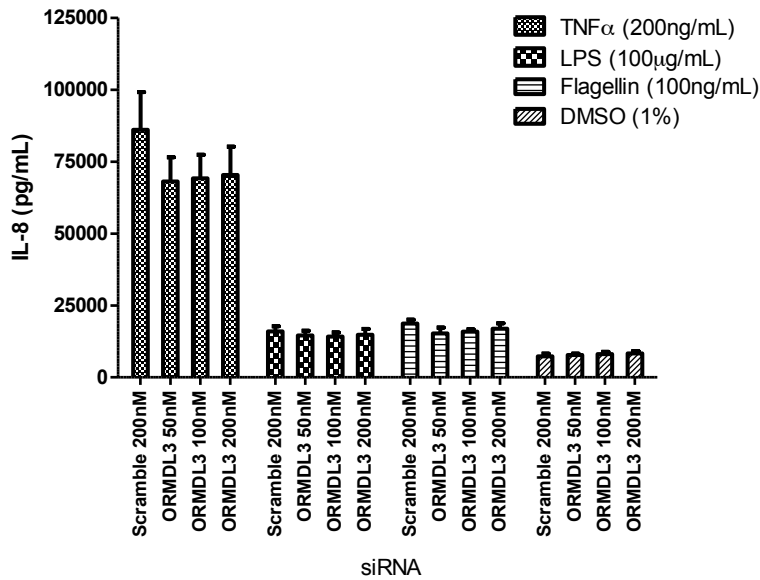

Cytokine production in siRNA-transfected 1HAE cells. A) Secreted IL-6 levels and B) secreted IL-8 levels after cell stimulation. Cells were stimulated with TNF $\alpha$ , LPS, flagellin, or DMSO (vehicle control) for 24 hours. Data represent the mean  $\pm$  SEM of four experimental repeats. Statistical analysis was performed using one-way ANOVA with Bonferroni post-test.

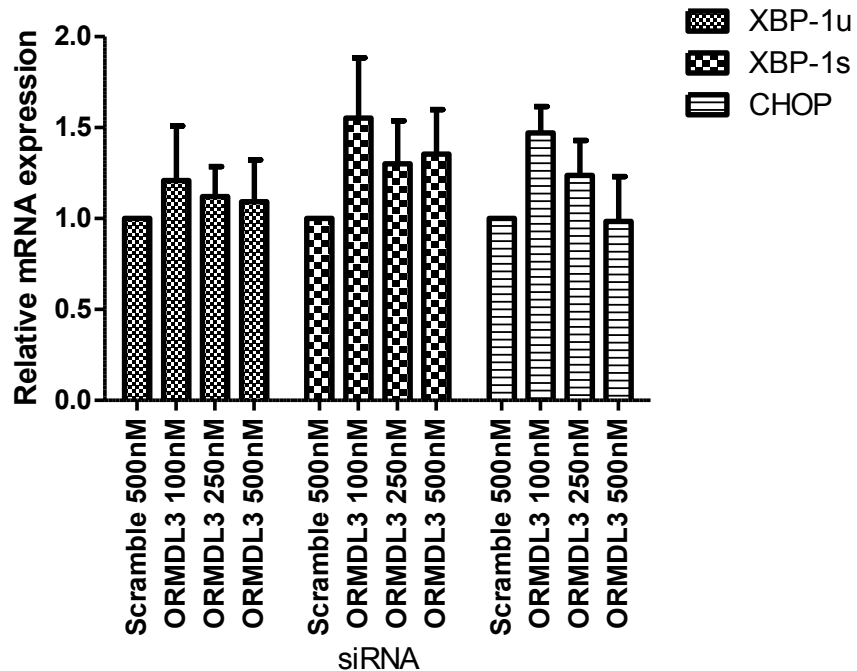

Expression of UPR gene markers in unstimulated A549 cells with *ORMDL3* knockdown. Three gene markers, *XBP-1u*, *XBP-1s*, and *CHOP*, were quantified 72 hours post-transfection. *XBP-1* is spliced upon activation of the IRE1 branch of the UPR and may lead to inflammatory responses. *CHOP* is induced through the PERK and ATF6 pathways and may lead to apoptosis. Data represent the mean  $\pm$  SEM of three experimental repeats. Statistical analysis was performed using one-way ANOVA with Bonferroni post-test.

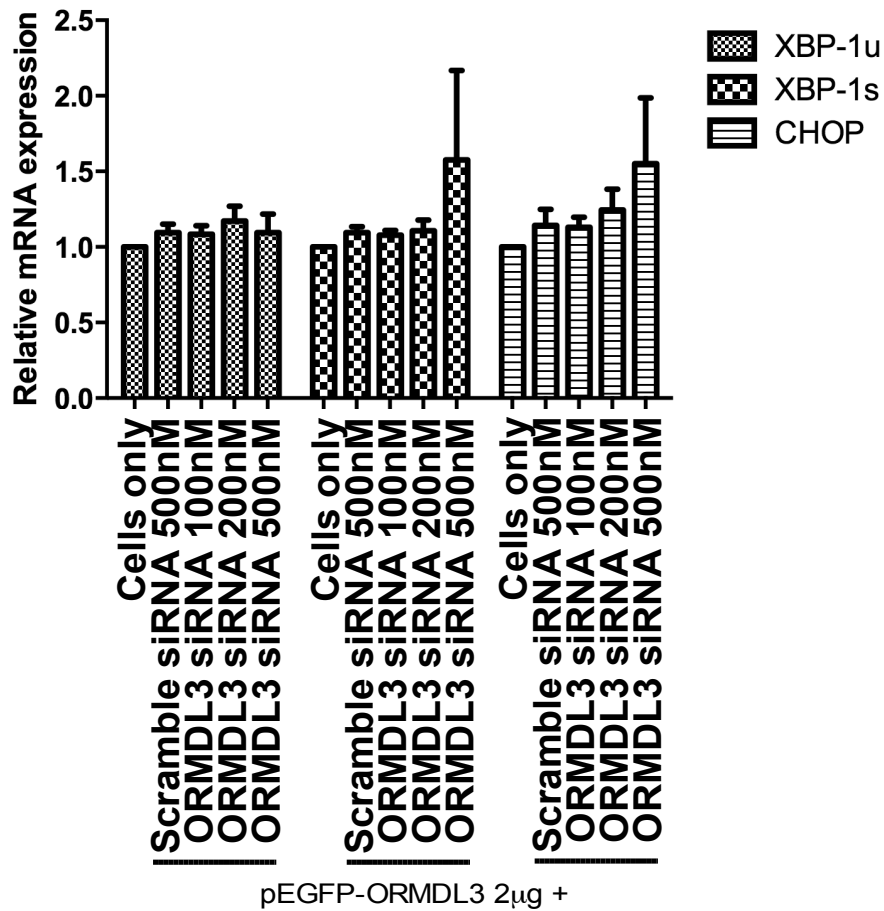

Expression of UPR gene markers in unstimulated 1HAE cells with *ORMDL3* knockdown. Three gene markers, *XBP-1u*, *XBP-1s*, and *CHOP*, were quantified 24 hours post-transfection. *XBP-1* is spliced upon activation of the IRE1 branch of the UPR and may lead to inflammatory responses. *CHOP* is induced through the PERK and ATF6 pathways and may lead to apoptosis. Data represent the mean  $\pm$  SEM of three experimental repeats. Statistical analysis was performed using one-way ANOVA with Bonferroni post-test.
